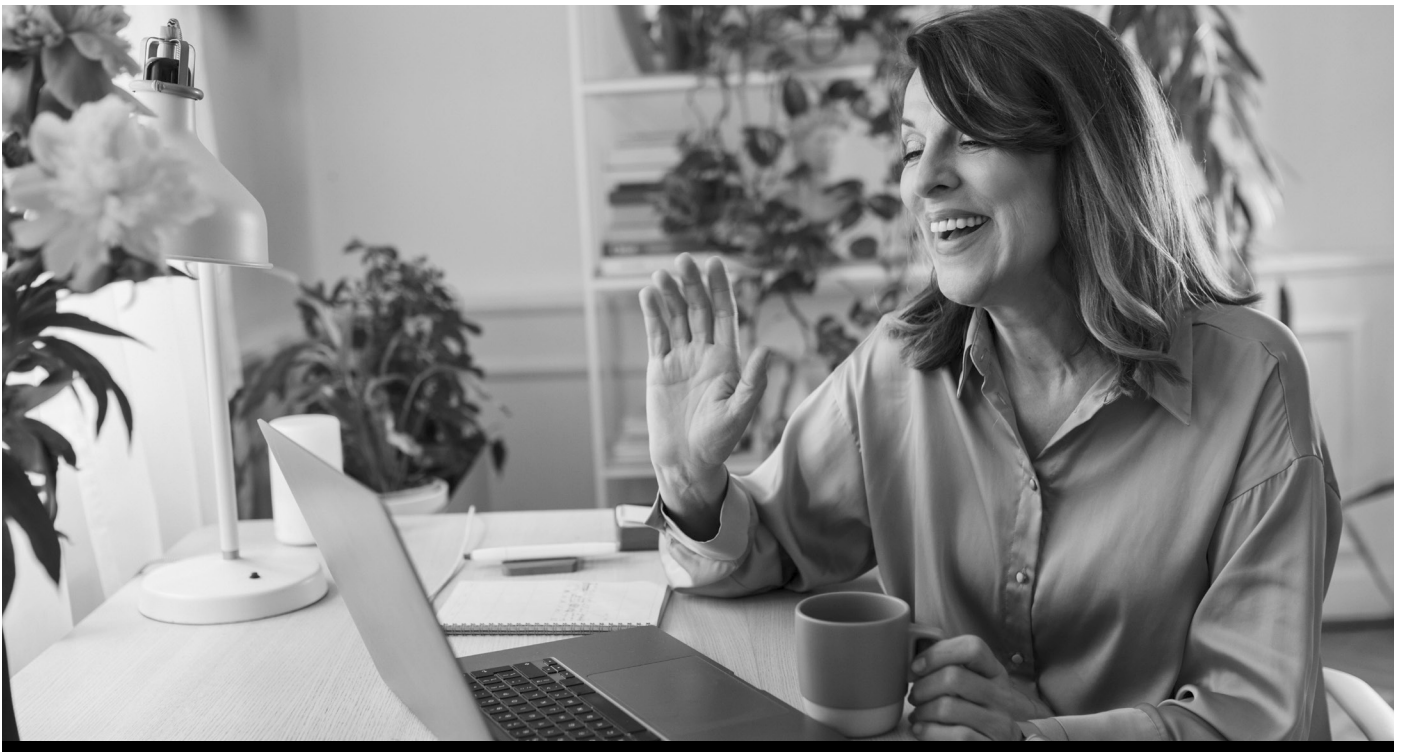

# We've Got You Covered

## American Psychiatric Association Endorsed Professional Liability Insurance Program

Designed for Psychiatrists in all practice settings

**DID YOU KNOW? We find that our policyholders are more likely to receive a board complaint than be named in a claim or lawsuit.**

Most insurance policies provided by employers do not include reimbursement for costs incurred to defend a complaint (or have limits that may be shared with others).

Not to worry... we include up to \$50,000 of defense reimbursement – with the option to increase this limit to \$150,000.

What's more, coverage for **Telepsychiatry** is provided, subject to the terms and conditions of the policy.

Cyber Coverage is available as an endorsement at renewal or on a new American Professional Agency policy. Available in most states on an admitted basis.

*(All discounts, coverage features and rating are subject to individual state approval.)*

Visit us at [apamalpractice.com](http://apamalpractice.com) or call **877-740-1777** to learn more.

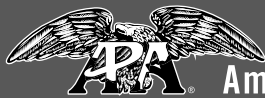

**American Professional Agency**

LEADERS IN PSYCHIATRIC MEDICAL LIABILITY INSURANCE

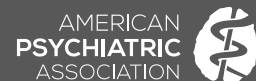

ACADIA  
HEALTHCARE

Talent  
Acquisition

## Improving the Lives We Touch

Acadia physicians are recognized thought leaders who help set the standard for clinical excellence while providing a vital service that improves lives, unites families, and strengthens communities.

### SPECIALTIES:

Inpatient | Residential | Specialty | PHP | IOP | Outpatient

For more information, please visit: [www.practicewithacadiahealth.com](http://www.practicewithacadiahealth.com)

## The American Journal of Psychotherapy

APA's journal of psychotherapy practice and research

Since 1947, the *American Journal of Psychotherapy* has provided a forum for advancing the theory, science, and clinical practice of psychotherapy, publishing articles that expand understanding of psychotherapies, especially in the domains of efficacy, process, education, and practice. The journal provides authors and readers the opportunity to engage fully in pressing psychotherapy issues such as defining core elements of psychotherapies, dissemination of evidence-based practices, scaling best practices for expansion to larger populations, understanding mechanisms of change, and evaluating best practices for psychotherapy training and supervision. From its new home as part of APA Publishing's portfolio of journals, the *American Journal of Psychotherapy* is the ideal vehicle to disseminate knowledge about psychotherapy and send a message that psychotherapy remains firmly within the purview of psychiatry.

- To receive updates on new content, follow the journal on  Twitter (@APAPubJournals) and sign up for free publication alerts at [psychiatryonline.org](http://psychiatryonline.org)
- To see more from the journal, including its entire 70+-year archive or to get information about submitting a paper, visit [www.psychotherapy.psychiatryonline.org](http://www.psychotherapy.psychiatryonline.org)

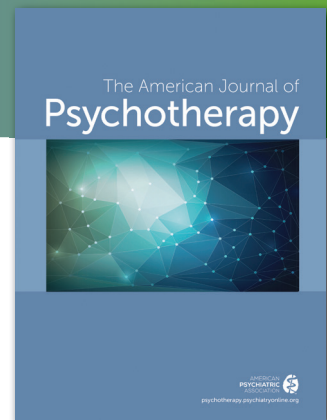

Holly A. Swartz, M.D., Editor-in-Chief

Frequency: Quarterly  
Online ISSN: 2575-6559  
[psychotherapy.psychiatryonline.org](http://psychotherapy.psychiatryonline.org)

AMERICAN  
PSYCHIATRIC  
ASSOCIATION  
PUBLISHING



appi.org  
1-800-368-5777  
appi@psych.org

Subscribe Now! Visit [appi.org](http://appi.org) for pricing and more information!

[psychotherapy.psychiatryonline.org](http://psychotherapy.psychiatryonline.org)

AH2041A

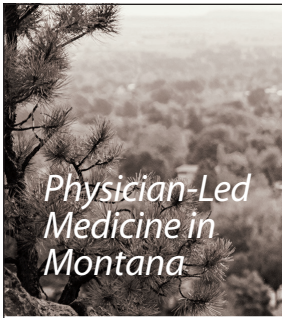

Physician-Led  
Medicine in  
Montana

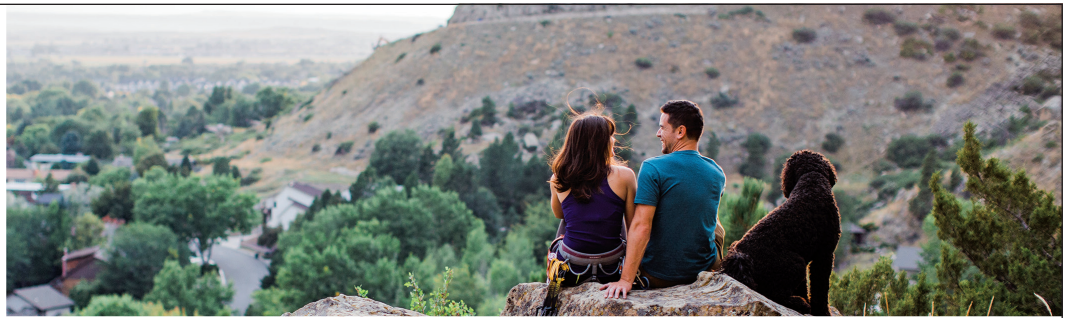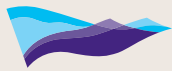

## Billings Clinic

Billings Clinic is nationally recognized for clinical excellence. Billings, Montana is a friendly college community located near the magnificent Rocky Mountains with great schools, safe neighborhoods and abundant family activities.

Exciting outdoor recreation is just minutes from home. 300 days of sunshine every year!

MAYO CLINIC  
CARE NETWORK

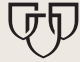

Member

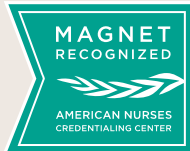

## Psychiatry Outpatient/Inpatient/Telepsychiatry

*Dreaming of the wide, open spaces?*

Seeking BE/BC Adult, Child & Emergency Psychiatrists to join the largest and most comprehensive Psychiatric Center in the Northern Rockies.

We are big enough to function as an academic medical center, yet small enough to feel like a caring family.

- **Top tier salary and student loan repayment**
- **Innovative** (emPATH unit, Project ECHO, integrated behavioral health)
- **Physician leadership opportunities**
- **Flexible schedules** (FT, PT, per diem, telepsych)
- **Opportunity to join faculty & teach** at Montana's only psychiatry residency training program – University of Washington Montana Track
- **Minimal call** with telepsych support
- **Mayo Clinic Care Network** provides clinical resources & direct access to Mayo Clinic specialists
- **Montana ranked #1 Best State to Work for Doctors** by *Wallethub*

**Contact: [physicianrecruiter@billingsclinic.org](mailto:physicianrecruiter@billingsclinic.org)  
[billingsclinic.com](http://billingsclinic.com)**

## A Psychiatrist's Guide to Advocacy

NEW!

Edited by Mary C. Vance, M.D.,  
Katherine G. Kennedy, M.D.,  
Ilse R. Wiechers, M.D., M.P.P., M.H.S.,  
and Saul Levin, M.D., M.P.A.

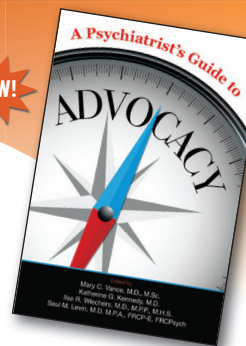

This is both a scholarly text and a handbook—a uniquely inspiring work that considers health advocacy as the public voicing of support for causes, policies, or opinions that advance patient and population health. Since the American Medical Association's 2001 adoption of the "Declaration of Professional Responsibility: Medicine's Social Contract with Humanity," the concept of advocacy as a professional duty has gradually become more accepted. Advocacy can, and does, take many forms, from lobbying the legislature for mental health parity to calling an insurer repeatedly for authorization of health care coverage that has been unfairly denied to a patient, to pointing out discriminatory practices in medical settings against individuals with mental health diagnoses. The many arenas of advocacy and its diverse beneficiaries are addressed in depth in this engaging book.

2020 • 458 pages • ISBN 978-1-61537-233-1 • Paperback • \$59.00 • Item #37233  
2020 • 458 pages • ISBN 978-1-61537-311-6 • eBook • \$47.00 • Item #37311

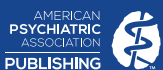

Order @ [www.appi.org](http://www.appi.org)  
Email: [appi@psych.org](mailto:appi@psych.org)  
Phone: 1-800-368-5777

Discounts for American Psychiatric Association Members

AH2027A

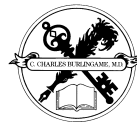

## Call for Nominations

The Institute of Living/Hartford Hospital is pleased to announce that nominations are now being accepted for the 2021 C. Charles Burlingame Award. This award, honoring an outstanding leader in psychiatric education, research or administration, is made in the memory of Dr. Burlingame, psychiatrist-in-chief from 1931 to 1950.

We invite you to nominate a person who has significantly advanced the field of psychiatry. The nomination must include a current curriculum vitae and two letters of support describing the candidate's achievements.

The Institute of Living is a comprehensive behavioral health system for the evaluation and treatment of psychiatric and addiction disorders. We offer a full continuum of services to patients and remain committed to the highest standards of clinical care, research and education.

### Past Recipients

- |                                       |                                   |
|---------------------------------------|-----------------------------------|
| 1988 Robert Kellner, M.D., Ph.D.      | 2005 Herbert D. Kleber, M.D.      |
| 1989 William T. Carpenter, Jr., M.D.  | 2006 Daniel N. Stern, M.D.        |
| 1990 Dennis P. Cantwell, M.D.         | 2007 Jerrold F. Rosenbaum, M.D.   |
| 1991 George E. Vaillant, M.D.         | 2008 K. Ranga Rama Krishnan, M.D. |
| 1992 A. John Rush, M.D.               | 2009 David J. Kupfer, M.D.        |
| 1993 John C. Nemiah, M.D.             | 2010 Professor Sir Michael Rutter |
| 1994 Maurice J. Martin, M.D.          | 2011 Jeffrey A. Lieberman, M.D.   |
| 1995 Otto F. Kernberg, M.D.           | 2012 Judith L. Rapoport, M.D.     |
| 1996 Charles P. O'Brien, M.D., Ph.D.  | 2013 Nora D. Volkow, M.D.         |
| 1997 Glen Owen Gabbard, M.D.          | 2014 Daniel R. Weinberger, M.D.   |
| 1998 Lissy F. Jarvik, M.D., Ph.D.     | 2015 David A. Brent, M.D.         |
| 1999 Nancy C. Andreasen, M.D., Ph.D.  | 2016 Steven S. Sharfstein, M.D.   |
| 2000 Lewis L. Judd, M.D.              | 2017 Harold Alan Pincus, M.D.     |
| 2001 Paul S. Appelbaum, M.D.          | 2018 Kenneth S. Kendler, M.D.     |
| 2002 Charles B. Nemeroff, M.D., Ph.D. | 2019 Max Fink, M.D.               |
| 2003 Dilip V. Jeste, M.D.             | 2020 Ned H. Kalin, M.D.           |
| 2004 David H. Barlow, Ph.D.           |                                   |

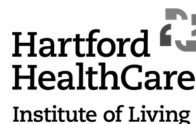

Nominations should be sent no later than March 19, 2021 to:  
Harold Schwartz, MD  
Psychiatrist-in-Chief Emeritus  
The Institute of Living/Hartford Hospital  
200 Retreat Ave., Hartford, CT 06106  
or e-mail to [Blair.Elliott@hhchealth.org](mailto:Blair.Elliott@hhchealth.org)

# THE AMERICAN PSYCHIATRIC ASSOCIATION

800 Maine Avenue, S.W., Suite 900, Washington, D.C. 20024

(888) 357-7924 (toll-free inside the U.S. and Canada)

web site: [www.psychiatry.org](http://www.psychiatry.org) • e-mail: [apa@psych.org](mailto:apa@psych.org)

## Chairpersons of Councils, Committees, and Task Forces

### Standing Committees

|                             |                                   |
|-----------------------------|-----------------------------------|
| <b>Bylaws</b>               | Kimberly D. Nordstrom, M.D., J.D. |
| <b>Elections</b>            | Justin W. Schoen, M.D.            |
| <b>Ethics</b>               | Rebecca W. Brendel, M.D., J.D.    |
| <b>Finance and Budget</b>   | Ann T. Sullivan, M.D.             |
| <i>Audit</i>                | Ayana Jordan, M.D., Ph.D.         |
| <i>Investment Oversight</i> | Steven S. Sharfstein, M.D.        |
| <b>Joint Reference</b>      | Vivian Pender, M.D.               |
| <b>Membership</b>           | Eric R. Williams, M.D.            |
| <b>Nominating</b>           | Bruce J. Schwartz, M.D.           |
| <b>Tellers</b>              | John A. Talbott, M.D.             |

### Non-Standing Committee

|                             |                               |
|-----------------------------|-------------------------------|
| <b>Conflict of Interest</b> | Sandra M. DeJong, M.D., M.Sc. |
|-----------------------------|-------------------------------|

### Councils

#### Council on Addiction Psychiatry

Jill Williams, M.D.

#### Council on Advocacy and Government Relations

Katherine G. Kennedy, M.D.

*Advocacy and Litigation Funding*

Bhasker J. Dave, M.D.

#### Council on Children, Adolescents, and Their Families

Gabrielle Shapiro, M.D.

*Women's Mental Health*

Ludmila B. De Faria, M.D.

#### Council on Communications

Isabel K. Norian, M.D.

#### Council on Consultation-Liaison Psychiatry

Sejal B. Shah, M.D.

#### Council on Geriatric Psychiatry

Robert P. Roca, M.D.

#### Council on Healthcare Systems and Financing

Robert L. Trestman, M.D., Ph.D.

*Integrated Care*

Henry Chung, M.D.

*RBRVS, Codes and Reimbursement*

Gregory G. Harris, M.D.

*Reimbursement for Psychiatric Care*

Laurence H. Miller, M.D.

*Telepsychiatry*

James H. Shore, M.D.

#### Council on International Psychiatry and Global Health

David C. Henderson, M.D.

*Chester Pierce Human Rights Award Committee*

[Pending]

#### Council on Medical Education and Lifelong Learning

Eindra Khin Khin, M.D.

*Innovation*

Nina Vasani, M.D.

*Scientific Program*

Jacqueline M. Feldman, M.D.

*Scientific Program-IPS (Oct. to Oct. tenure)*

[Pending]

*Vestermark Award Committee*

Joseph A. Cheong, M.D.

*Well-being and Burnout*

Batool Kazim, M.D.

#### Council on Minority Mental Health and Health Disparities

Eric Yarbrough, M.D.

#### Council on Psychiatry and Law

Debra A. Pinals, M.D.

*Judicial Action*

Reena Kapoor, M.D.

#### Council on Quality Care

Grayson S. Norquist, M.D.

*Mental Health Information Technology*

John Torous, M.D.

*Quality and Performance Measurement*

Carol Alter, M.D.

*Practice Guidelines*

Daniel J. Anzia, M.D.

#### Council on Research

Jonathan E. Alpert, M.D., Ph.D.

*Psychiatric Dimensions of Disasters*

Joshua C. Morganstein, M.D.



# The American Psychiatric Association Publishing Textbook of Substance Use Disorder Treatment, Sixth Edition

Edited by Kathleen T. Brady, M.D., Ph.D., Frances R. Levin, M.D.,  
Marc Galanter, M.D., and Herbert D. Kleber, M.D.

JUST PUBLISHED!

A robust revision, including many entirely new chapters addressing policy, the latest treatment approaches, and special topics, the Sixth Edition of *The APA Publishing Textbook of Substance Use Disorder Treatment* offers a comprehensive and compelling review of this ever-evolving field. New sections address important topics that have gained prominence or become the focus of increased research attention since the Fifth Edition was released. For example, substance use and other psychiatric disorders often co-occur, and the resulting dual disorder is frequently associated with greater symptom severity and worse long-term prognosis than either disorder alone. Accordingly, the section on psychiatric comorbidity covers the epidemiology, assessment, and treatment of substance use disorders (SUDs) that co-occur with psychotic, mood, anxiety, eating, attention-deficit/hyperactivity, or trauma-related disorders.

The section devoted to special populations has been revamped, and the topics have been thoroughly updated, some now covered by new contributors and others completely new to this edition. SUDs among women (including perinatal issues), adolescents, patients with chronic pain, sexual and gender minority populations, and older adults are addressed in detailed chapters, as are behavioral addictive disorders and cross-cultural aspects of substance-related and addictive disorders.

Finally, the editors have included a section devoted to critically important topics in public health, including the U.S. opioid epidemic, cannabis policy and use, HIV/AIDS and hepatitis C, nicotine and public health, and the prevention of SUDs.

Evidence-based, down to earth, and meticulously edited, the new Sixth Edition of *The APA Publishing Textbook of Substance Use Disorder Treatment* is an essential resource for clinicians who treat SUDs in a variety of settings—from examining rooms to emergency departments, and from hospitals to recovery facilities.

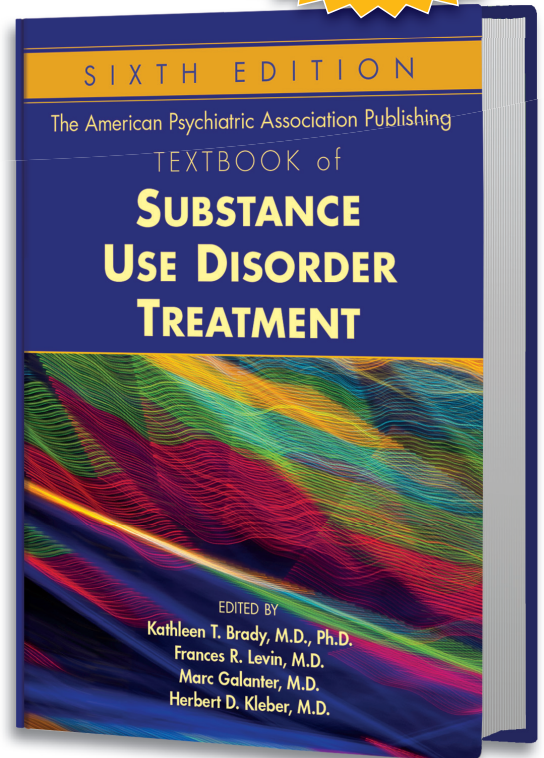

2021 • 912 pages • ISBN 978-1-61537-221-8 • Hardcover • \$215.00 • Item #37221

2021 • 912 pages • ISBN 978-1-61537-353-6 • eBook • \$175.00 • Item #37353

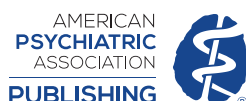

ORDER @ [www.appi.org](http://www.appi.org) | Email: [appi@psych.org](mailto:appi@psych.org) | Toll Free: 1-800-368-5777

20% Discount for American Psychiatric Association Members

25% Discount for APA Resident-Fellow Members

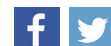

# Go Online

Visit [ajp.psychiatryonline.org](http://ajp.psychiatryonline.org) for these features!

## AJP in Advance *Discover the latest research advances before they appear in print*

### Reward Processing in Children With Disruptive Behavior Disorders and Callous-Unemotional Traits in the ABCD Study

fMRI in more than 1,500 school-aged children showed evidence that disruptive behavior disorder is characterized by decreased neural sensitivity of proactive cognitive control regions during reward anticipation, coupled with increased sensitivity of salience network and reward regions during reward receipt. This neural profile provides further insight into the core behavioral features associated with disruptive behavior disorders, such as aggression and impulsivity.

## AJP CME *Earn CME credit: 3 courses per issue*

You can earn CME credits by reading articles in *The American Journal of Psychiatry*. Three articles in this issue form a short course that consists of reading the article and answering three multiple-choice questions with a single correct answer for up to 1 *AMA PRA Category 1 Credit™* each. Credit is issued only to subscribers of the online AJP CME Course Program.

See the table below for the articles in this month's issue that are the subject of a CME quiz.

## AJP Multimedia *Access audio and video for highlights of each issue*

In **AJP Audio** each month, Executive Editor Michael Roy speaks with the author(s) of an article about the results of their research. In addition, Deputy Editor Daniel S. Pine, M.D., summarizes one or two articles in an **Issue Highlights** video. The table below lists the articles included in this month's audio podcast and video.

| In this issue                                                                                                                                             | CME | Podcast | Video |
|-----------------------------------------------------------------------------------------------------------------------------------------------------------|-----|---------|-------|
| Psychiatry Diversity Leadership in Academic Medicine: Guidelines for Success (p. 224)                                                                     | ✓   | ✓       |       |
| Contraception for Women With Psychiatric Disorders (p. 247)                                                                                               | ✓   |         | ✓     |
| Ulipristal Acetate for Treatment of Premenstrual Dysphoric Disorder: A Proof-of-Concept Randomized Controlled Trial (p. 256)                              |     |         | ✓     |
| The Importance of Conduct Disorder in the Treatment of Violence in Schizophrenia: Efficacy of Clozapine Compared With Olanzapine and Haloperidol (p. 266) | ✓   |         |       |

## History of Psychiatry *Revisit the field's rich history through the AJP Archive*

### 50 Years Ago This Month: Routine Diagnosis by Computer

Decades before AI became all the rage, this report described a clinical computer program that used data collected by clerks, technicians, relatives, and staff to build a database from which computer-generated probability statements regarding diagnostic classifications augmented by statistical techniques helped predict length of hospital stay, risk of running away, and assaultive ideation.

@APAPubJournals

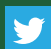

Psychiatry Online

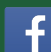

AMERICAN  
PSYCHIATRIC  
ASSOCIATION  
PUBLISHING

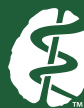

[www.appi.org](http://www.appi.org)  
1-800-368-5777  
[appi@psych.org](mailto:appi@psych.org)
