# The American Journal of Psychiatry

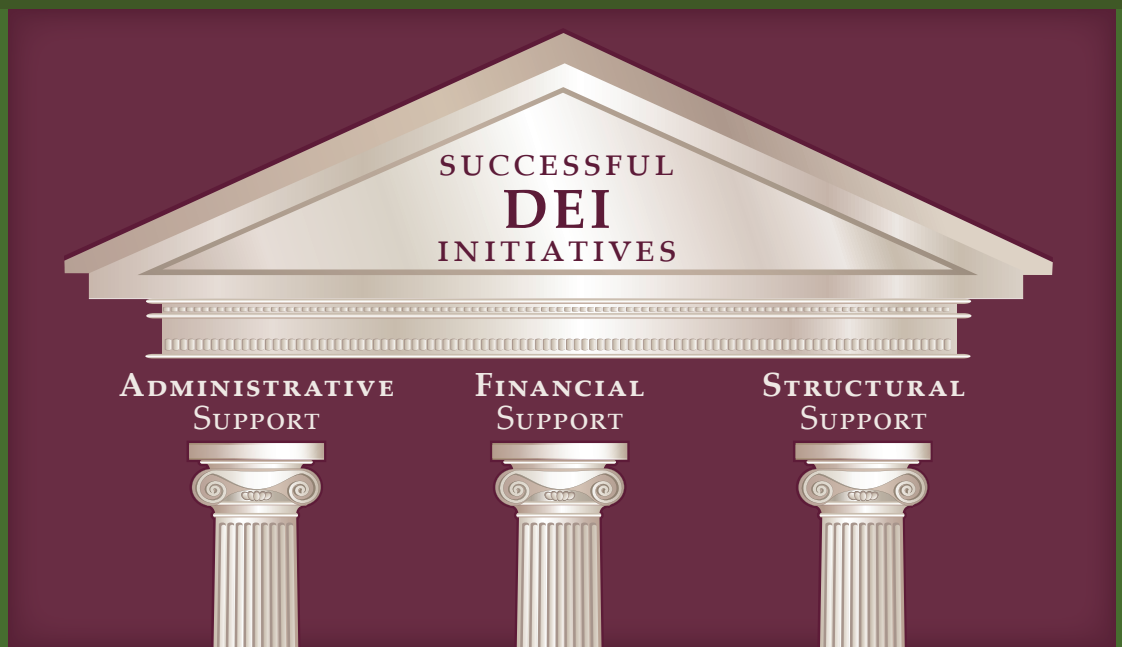

Psychiatry Diversity Leadership in Academic Medicine:  
Guidelines for Success

Electroconvulsive Therapy in Mania: A Review of  
80 Years of Clinical Experience

Psychotherapy at a Distance

Contraception for Women With Psychiatric Disorders
